# Supplementary material for: A robust design for identification of the Parasite Clearance Estimator
Source: PubMed Central journal article supplement (PMC3831256; doi:10.1186/1475-2875-12-410), 2013-11-13
Supplement: 1475-2875-12-410-S1.pdf [file 1475-2875-12-410-S1.pdf]

## The Parasite Clearance Estimator

The parasite clearance estimator (PCE) determines the parasite clearance rate constant as follows (the description below was modified from [3]):

1. Different regression models (typically linear, quadratic or cubic) are fit to an individual's log parasite-time data (see Figure 1 for typical log parasite-time profiles), and the "best" model is determined by the Akaike Information Criteria (AIC) or residual sum of squares.
2. If the best model is a linear model, then the parasite clearance rate constant  $K$  is simply the estimated slope from this model:

$$E(\log(P)) = \beta_0 + \beta_1 t,$$

where  $P$  is the total parasite count,  $t$  is time (hours post initial treatment) and  $K = \beta_1$ .

3. If the best model is not the linear model (e.g. a quadratic or cubic model resulted in a lower AIC), then:
  - (a) for each log parasitaemia predicted by the best model ( $E(\log(P_j))$ ), with  $j$  being the  $j^{\text{th}}$  measurement of parasite burden at time  $t$ , calculate the slope  $S_j$  between this point and the preceding predicted value:

$$S_j = \frac{E(\log(P_j)) - E(\log(P_{j-1}))}{t_j - t_{j-1}}$$

For example, if a patient had 6 measurements of parasite burden (including the initial value), there would be five slope values ( $S_2, S_3, \dots, S_6$ ).

- (b) Determine the  $S_j$  with the most extreme negative value,  $S_{max}$ .
- (c) For each slope  $S_j$ , calculate  $S_{n_j} = S_j/S_{max}$ . Note that a negative  $S_{n_j}$  implies a rise in the parasite count.
- (d) Determine  $K$  using the flow chart in Figure S1.

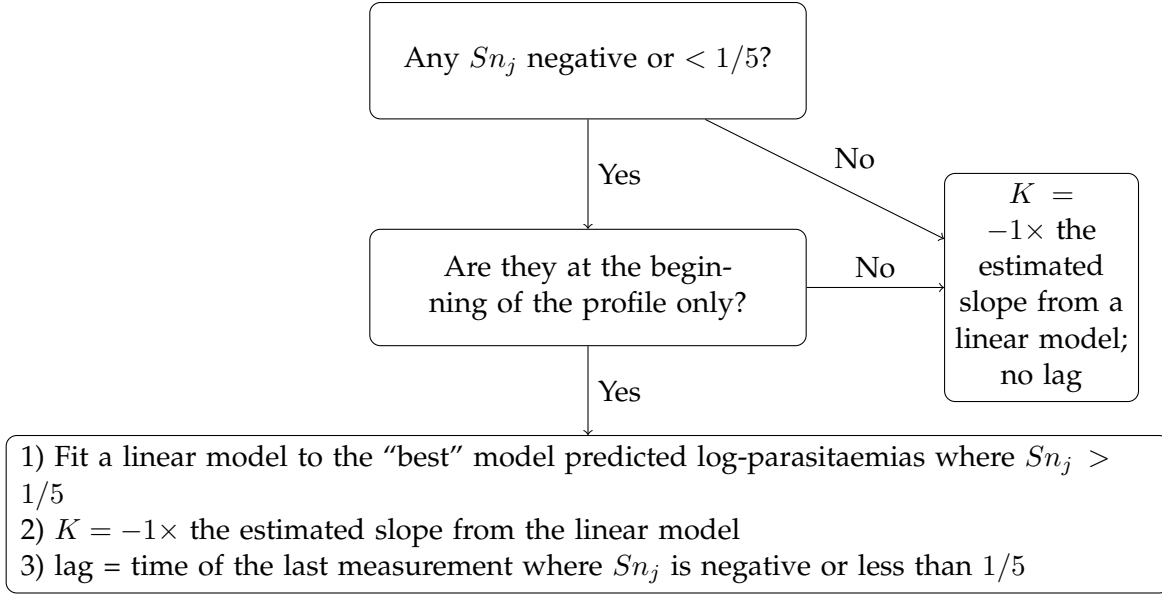

Figure S1: Flow chart for calculation of the parasite clearance rate constant via the Parasite Clearance Estimator

## Simulation models used in the evaluation procedure

The equations below display the simulation models used in the evaluation procedure. For all equations,  $P_{ij}$  represents the total parasite count for the  $j^{\text{th}}$  observation of the  $i^{\text{th}}$  individual, and  $t$  indicates time (hours post initial treatment).

$$\begin{aligned} \log(P_{ij}) &= (10.5 + b_{0i}) - (0.214 + b_{1i})t + \varepsilon_{ij} \\ b_{0i} &\sim N(0, 0.50^2) \\ b_{1i} &\sim N(0, 0.02^2) \\ \varepsilon_{ij} &\sim N(0, 0.41^2) \end{aligned}$$

$$\begin{aligned} \log(P_{ij}) &= (10.6 + b_{0i}) + (0.066 + b_{1i})t - (0.0034 + b_{2i})t^2 + \varepsilon_{ij} \\ b_{0i} &\sim N(0, 0.50^2) \\ b_{1i} &\sim N(0, 0.02^2) \\ b_{2i} &\sim N(0, 0.0005^2) \\ \varepsilon_{ij} &\sim N(0, 0.41^2) \end{aligned}$$

$$\begin{aligned} \log(P_{ij}) &= (13.3 + b_{0i}) + (0.207 + b_{1i})t - (0.026 + b_{2i})t^2 + 0.00038t^3 + \varepsilon_{ij} \\ b_{0i} &\sim N(0, 0.50^2) \\ b_{1i} &\sim N(0, 0.01^2) \\ b_{2i} &\sim N(0, 0.001^2) \\ \varepsilon_{ij} &\sim N(0, 0.41^2) \end{aligned}$$
